# Supplementary material
Source: publisher figshare collection journal article supplement (https://gsajournals.figshare.com/ndownloader/files/20114456)
Supplement: Supplementary file 1 [file 20114456]

**Supplementary Table S1. The sequences of CEP112 sgRNAs.**

| Name | Strand | Sequences (5’-3’) |
| --- | --- | --- |
| sgRNA-1 (C1) | F | CACCCACACATCACGGTTACAATT |
| R | AAACAATTGTAACCGTGATGTGTG |
| sgRNA-2 (C2) | F | CACCTCTGAGGCTGAACAATCGGG |
| R | AAACCCCGATTGTTCAGCCTCAGA |
| sgRNA-3 (C3) | F | CACCCGAGGAAGAGCGATGCGTGC |
| R | AAACGCACGCATCGCTCTTCCTCG |
| sgRNA4 (C4) | F | CACCTAGGGAGGCGTTCGCAGAGC |
| R | AAACGCTCTGCGAACGCCTCCCTA |
| sgRNA-5 (C5) | F | CACCGTGAAGGACACACTATGGAT |
| R | AAACATCCATAGTGTGTCCTTCAC |
| sgRNA-6 (C6) | F | CACCCGCTTCAATGACGGGAAAGT |
| R | AAACACTTTCCCGTCATTGAAGCG |
| sgRNA-7 (C7) | F | CACCCTGAAGTTCATGTGCGAAGT |
| R | AAACAATTGTAACCGTGATGTGTG |

**Supplementary Table S2. The sequences of CEP112 and ROSA26 HA design primers**

| Name | | Strand | Sequence (5’-3’) | Product (bp) |
| --- | --- | --- | --- | --- |
| CEP112 | LA250 | F | GACCTGCAGGCGGCCGCCCATCCATAGTGTGTCCTTCACTTGTTTTATGCTCCAGAGGGCCTT | 250 |
| R | ATGGCGCGCGCGGCCGGATGGGAGACTGTGTCCTACCT |
| LA340 | F | GACCTGCAGGCGGCCGCCCATCCATAGTGTGTCCTTCACCCTCTGAAGTTCATGTGCGAA | 340 |
| R | ATGGCGCGCGCGGCCGGATGGGAGACTGTGTCCTACCT |
| LA1199 | F | GACCTGCAGGCGGCCGCCCATCCATAGTGTGTCCTTCACAGGCGTAATGGGGCTTGAT | 1199 |
| R | ATGGCGCGCGCGGCCGCGGATGGGAGACTGTGTCCTACCT |
| LA2003 | F | GACCTGCAGGCGGCCGCCCATCCATAGTGTGTCCTTCACCTAATCAGTAAGAGCCCCAGGAA | 2003 |
| R | ATGGCGCGCGCGGCCGCGGATGGGAGACTGTGTCCTACCT |
| RA2092 | F | GATCTGTCGACTCGAGATAGTGTGTCCTTCACACATCA | 2092 |
| R | ATTGCAGATCCTCGAGTGTTTCCTTATCTCCATTCAC |
| RA3219 | F | GATCTGTCGACTCGACACATCACGGTTACAATTAGGC | 3219 |
| R | ATTGCAGATCCTCGAGGCTCTTTCTAAGGCTATAACTGG |
| ROSA26 | LA320 | F | GACCTGCAGGCGGCCGCGTGAGAGTTATCTGACCGTAAGGTTGAGCAGGTGTACGAGGAC | 320 |
| R | ATGGCGCGCGCGGCCGGTAAGGATGCAAGTGAGGG |
| LA1040 | F | GACCTGCAGGCGGCCGCGTGAGAGTTATCTGACCGTAAGGAGGGTCAGTGAAAGTGGCT | 1040 |
| R | ATGGCGCGCGCGGCCGGTAAGGATGCAAGTGAGGG |
| RA1214 | F | GATCTGTCGACTCGACGGTCAGATAACTCTCACTCATAC | 1214 |
| R | ATTGCAGATCCTCGAGATACTTCCAAGGCTCAACA |
| RA2046 | F | GATCTGTCGACTCGACGGTCAGATAACTCTCACTCATAC | 2046 |
| R | ATTGCAGATCCTCGAGTGATTAGACATACAGTTTCCCT |
| RA3769 | F | GATCTGTCGACTCGACGGTCAGATAACTCTCACTCATAC | 3769 |
| R | ATTGCAGATCCTCGAGGTTTCTCACCCACTTCATC |

**Supplementary Table S3. Primer information for PCR amplification**

| Name | Strand | Sequence (5’-3’) | Product (bp) |
| --- | --- | --- | --- |
| C-1,2,5 | F | CGCAGCCTTTCTTCTGCTC | 585 |
| R | GGAAGCCTGCAAAGACACT |
| C-3 | F | GGCTTTTGTGCTTGATGAT | 592 |
| R | CCTGTCTGCGGTAAGTTGA |
| C-4 | F | GGCTTTATTCTGGGTTTGT | 674 |
| R | AATTTTAAGGGCCATTCGT |
| C-6,7 | F | AAAGCCACCTCAGTCAGCC | 812 |
| R | AACCTCCCGATTGTTCAGC |
| RTQ-copy | F | TTTACATACACCGGACCTACAGACG | 176 |
| R | TCAAAGGCATAGGTATGGTAAGCG |
| TG-BgEgXyAp | F | TCAAAGGCATAGGTATGGTAAGCG | 1003 |
| R | CTTTCACAGTGGTCACCCAGTTTC |
| LA | F | AAGAAGCCAGAATGTAATCAGC | 1133 |
| R | CACTTACCGCATTGACAAGC |
| RA | F | GCAAAGACCCCAACGAGA | 4003 |
| R | GTCTGCCCATATTCAAGATCGAG |
| CEP112-LA-MF | F | AAGAAGCCAGAATGTAATCAGC | 1133 |
| R | CACTTACCGCATTGACAAGC |
| CEP112-RA-MF | F | ACGATGTTCCAGATTACGCTTG | 4600 |
| R | GTCTGCCCATATTCAAGATCGAG |
| PSP | F | GGATACTTTATTATTCTCTGACTCGGTC | 1817 |
| R | CATAGTTGGTTGAAGGAATGTGTGC |
